RUNNING TITLE: OC oxidation processes across vegetation

Carbon inputs from riparian vegetation limit oxidation of physically-bound organic carbon via biochemical and thermodynamic processes

Emily B. Graham<sup>1</sup>, Malak M. Tfaily<sup>2</sup>, Alex R. Crump<sup>1</sup>, Amy E. Goldman<sup>1</sup>, Lisa Bramer<sup>1</sup>, Evan Arntzen<sup>1</sup>, Elvira Romero<sup>1</sup>, C. Tom Resch<sup>1</sup>, David W. Kennedy<sup>1</sup>, and James C. Stegen<sup>1</sup>

<sup>1</sup>Pacific Northwest National Laboratory, Richland, WA USA

<sup>2</sup>Environmental Molecular Science Laboratory, Richland, WA USA

**Correspondence:** Emily B. Graham, Pacific Northwest National Laboratory, PO Box 999, Richland, WA 99352, 509-372-6049, emily.graham@pnnl.gov

**Keywords:** terrestrial-aquatic interface, priming, recalcitrant, labile, FTICR-MS, aerobic metabolism, hyporheic zone

### **Key points.**

- Riparian vegetation protects bound-OC stocks
- Biochemical processes associated with OC oxidation vary with vegetation conditions
- Common thermodynamic principles underlie OC oxidation regardless of vegetation conditions

1 **Abstract.**

2           In light of increasing terrestrial carbon (C) transport across aquatic boundaries, the  
3 mechanisms governing organic carbon (OC) oxidation along terrestrial-aquatic interfaces are  
4 crucial to future climate predictions. Here, we investigate the biochemistry, metabolic pathways,  
5 and thermodynamics corresponding to OC oxidation in the Columbia River corridor using ultra-  
6 high resolution C characterization. We leverage natural vegetative differences to encompass  
7 variation in terrestrial C inputs. Our results suggest that decreases in terrestrial C deposition  
8 associated with diminished riparian vegetation induce oxidation of physically -bound OC. We  
9 also find that contrasting metabolic pathways oxidize OC in the presence and absence of  
10 vegetation and—in direct conflict with the ‘priming’ concept—that inputs of water-soluble and  
11 thermodynamically favorable terrestrial OC protects bound-OC from oxidation. In both  
12 environments, the most thermodynamically favorable compounds appear to be preferentially  
13 oxidized regardless of which OC pool microbiomes metabolize. In turn, we suggest that the  
14 extent of riparian vegetation causes sediment microbiomes to locally adapt to oxidize a particular  
15 pool of OC, but that common thermodynamic principles govern the oxidation of each pool (*i.e.*,  
16 water-soluble or physically-bound). Finally, we propose a mechanistic conceptualization of OC  
17 oxidation along terrestrial-aquatic interfaces that can be used to model heterogeneous patterns of  
18 OC loss under changing land cover distributions.

19

20

21

## 22 1. Introduction

23           Soils and nearshore sediments comprise a carbon (C) reservoir that is 3.2 times larger  
24 than the atmospheric C pool [*Burd et al.*, 2016], yet Earth System Models (ESMs) struggle to  
25 integrate mechanisms of OC oxidation in these environments into predictions of atmospheric  
26 carbon dioxide concentrations [*Todd-Brown et al.*, 2013; *Wieder et al.*, 2013; *Wieder et al.*,  
27 2015]. In particular, OC oxidation in nearshore habitats constitutes a significant uncertainty in  
28 atmospheric C flux [*Aalto et al.*, 2003; *Battin et al.*, 2009] and knowledge about C cycling along  
29 these transitional ecosystems is necessary to accurately predict global C cycling [*Burd et al.*,  
30 2016]. Terrestrial C inputs into aquatic systems have nearly doubled since pre-industrial times;  
31 an estimated 2.9 Pg C now crosses terrestrial-aquatic interfaces annually (vs. 0.9 Pg C yr<sup>-1</sup> stored  
32 within forested ecosystems) [*Battin et al.*, 2008; *Regnier et al.*, 2013]. The magnitude of this flux  
33 has garnered significant recent attention [*Battin et al.*, 2008; *Battin et al.*, 2009; *Regnier et al.*,  
34 2013], yet the biochemical, metabolic, and thermodynamic mechanisms governing OC oxidation  
35 along terrestrial-aquatic interfaces remain a crucial uncertainty in climate predictions. New  
36 molecular techniques are providing insight into OC dynamics [*Mason et al.*, 2016; *Malak M*  
37 *Tfaily et al.*, 2015; *M.M. Tfaily et al.*, 2017], but we still lack an understanding of why some OC  
38 remains stabilized for millennia whereas other OC is rapidly oxidized [*Schmidt et al.*, 2011].

39           The ability of microorganisms to oxidize complex OC is an important constraint on C  
40 cycling because OC is a mixture of compounds with different propensities for biotic oxidation  
41 [*Hedges and Oades*, 1997; *Hedges et al.*, 2000]. Within terrestrial research, OC oxidation is  
42 often framed within the concept of ‘priming,’ whereby microbial oxidation of chemically-  
43 complex, less bioavailable OC is fueled by the addition of more bioavailable and  
44 thermodynamically favorable OC compounds [*Kuzyakov*, 2010]. However, the applicability of

45 priming in aquatic environments is unclear [*Bengtsson et al.*, 2014; *Bianchi*, 2011; *Guenet et al.*,  
46 2010]. Aquatic systems, and in particular nearshore environments, frequently experience mixing  
47 of terrestrial and aquatic C sources with distinct chemical character, providing a theoretical basis  
48 for priming expectations [*Bengtsson et al.*, 2014; *Guenet et al.*, 2010]. Consistent with priming,  
49 *Guenet et al.* [2010] proposed that this mixing generates “hotspots” or “hot moments” of  
50 biological activity facilitated by complementary C resources. Alternatively, OC stabilization in  
51 sediments is tightly linked to organomineral interactions, which provide physical protection from  
52 extracellular enzyme activity [*Hedges and Keil*, 1995; *Hunter et al.*, 2016; *Rothman and Forney*,  
53 2007], and the strength of these interactions may override any influence of priming. Early  
54 investigations of priming effects in aquatic systems have been inconclusive, with evidence both  
55 for [*Dorado-García et al.*, 2016] and against [*Bengtsson et al.*, 2014; *Catalán et al.*, 2015]  
56 priming mechanisms.

57         Several new perspectives have attempted to move beyond frameworks, such as priming,  
58 that depend on strict chemical definitions to predict OC oxidation [*Burd et al.*, 2016; *Cotrufo et*  
59 *al.*, 2013; *Lehmann and Kleber*, 2015]. Recent work proposes that the probability of OC  
60 oxidation is related to a spectrum of chemical properties and that even very complex OC can be  
61 oxidized when more thermodynamically favorable OC is depleted or isolated from  
62 microorganisms. For example, *Lehmann and Kleber* [2015] have proposed a ‘soil continuum  
63 hypothesis’ whereby OC is a gradient of continually decomposing compounds that are variably  
64 accessible for biotic oxidation, with no notion of chemically labile versus recalcitrant  
65 compounds. Similarly, *Burd et al.* [2016] have suggested that OC oxidation is a ‘logistical  
66 problem’ involving the ability of microorganisms to access and metabolize compounds. Both

67 concepts capture the emerging belief that chemically-complex, less thermodynamically favorable  
68 OC can be oxidized when more favorable compounds are inaccessible.

69 Here, we address a critical knowledge gap in predicting the global C balance [Aalto *et al.*,  
70 2003; Battin *et al.*, 2009; Burd *et al.*, 2016; Regnier *et al.*, 2013]—mechanisms governing OC  
71 oxidation along terrestrial-aquatic interfaces. Specifically, we investigate the biochemistry,  
72 microbial metabolism, and thermodynamics of OC oxidation in nearshore water-soluble and  
73 physically-bound (*i.e.*, mineral and microbial) OC pools along a freshwater terrestrial-aquatic  
74 interface. We leverage natural variation in riparian vegetation along the Columbia River in  
75 Eastern Washington State, the largest river in the U.S. west of the Continental Divide [Ebel *et*  
76 *al.*, 1989; Moser *et al.*, 2003], to examine these mechanisms in the context of spatial variation in  
77 terrestrial C deposition. Consistent with the priming paradigm, we hypothesize that (a) C  
78 deposition associated with riparian vegetation increases total aerobic metabolism and enhances  
79 oxidation of bound-OC stocks, while (b) areas without riparian vegetation foster lower rates of  
80 aerobic metabolism with minimal oxidation of bound-OC.

81

## 82 **2. Materials and Methods**

### 83 *2.1. Site Description*

84 This study was conducted along the Columbia River shoreline within the Hanford Site  
85 300 Area (approximately 46° 22' 15.80"N, 119° 16' 31.52"W) in eastern Washington State  
86 [Graham *et al.*, 2016a; 2017; Slater *et al.*, 2010; Zachara *et al.*, 2013]. The Columbia River  
87 experiences shoreline geographic variation in vegetation patterns, substrate geochemistry, and  
88 microbiome composition [Arntzen *et al.*, 2006; Lin *et al.*, 2012; Peterson and Connelly, 2004;  
89 Slater *et al.*, 2010; James C Stegen *et al.*, 2016; James C. Stegen *et al.*, 2012; Zachara *et al.*,

90 2013]. Accordingly, the Hanford Reach of the Columbia River embodies an ideal natural system  
91 in which to examine heterogeneity of terrestrial OC inputs and subsequent OC oxidation  
92 mechanisms.

93 Liquid N<sub>2</sub>-frozen sediment profiles (0-60 cm) were collected along two shoreline  
94 transects with or without riparian vegetation (hereafter, V and NV for ‘vegetated’ and ‘not  
95 vegetated’, Table 1, Figure 1) perpendicular to the Columbia River in March 2015, separated by  
96 a distance of ~170m. V was characterized by a moderately sloping scour zone, small boulders,  
97 and a closed canopy of woody perennials *Morus rubra* (Red Mulberry) and *Ulmus rubra*  
98 (Slippery Elm). The highest elevation (upper bank) samples were collected within the rooting  
99 zone. In contrast, NV was characterized by a gradually sloping scour zone, cobbled armor layer,  
100 and minimal vegetation. We collected profiles at three locations in each transect with 5m spacing  
101 within a spatial domain of ~175 x 10m. In each transect, the lower bank profile was located at  
102 ~0.5m (vertical distance) below the midpoint, which was in turn ~0.5m below the upper bank  
103 profile (approximately 10m horizontal distance from upper to lower profiles). All cores were  
104 collected (see below) during conditions in which the sediments were fully saturated, either being  
105 underwater at the time of coring or recently underwater prior to coring. Each profile was  
106 sectioned into 10-cm intervals from 0-60cm. Because OC composition (see below for Methods)  
107 did not differ across upper (0-10cm) to lower (50-60cm) sections in each profile, each 10-cm  
108 section was used as a replicate sample to provide sufficient sample size (n >15 at each transect)  
109 for comparisons between the vegetated and non-vegetated transect.

110

111 *2.2. Sample Collection*

112           Liquid N<sub>2</sub>-frozen sediment profiles were collected as outlined in *Moser et al.* [2003]  
113 using a method developed by *Lotspeich and Reed* [1980] and modified by *Rood and Church*  
114 [1994]. A pointed stainless steel tube (152 cm length, 3.3 cm outside diameter, 2.4 cm inside  
115 diameter) was driven into the river bed to a depth of ~60cm. Liquid N<sub>2</sub> was poured down the  
116 tube for ~15 minutes, until a sufficient quantity of material had frozen to the outside of the rod.  
117 The rod and attached material were removed from the riverbed with a chain hoist suspended  
118 beneath a tripod. Profiles were placed over an aluminum foil lined cooler containing dry ice.  
119 Frozen material was removed with a mallet. The material was then wrapped in the foil and  
120 transported on dry ice to storage at -80°C. In the lab, profiles were sectioned into 10cm depth  
121 intervals from 0-60cm in an anaerobic glove bag (n = 6 per profile, except for the lowest  
122 elevation in the non-vegetated transect which was sectioned only from 30-60cm due to low  
123 recovery yield from 0-30cm; total n = 33).

124

### 125 2.3. Physicochemistry

126           Details concerning physicochemical assays are provided in the Supporting Information.  
127 Briefly, we determined the particle distribution of sediments by separating size fractions via  
128 sieving; total nitrogen, sulfur, and carbon content were determined using an Elementar vario EL  
129 cube (Elementar Co.Germany); NH<sub>4</sub><sup>+</sup> was extracted with KCl and measured with Hach Kit  
130 2604545 (Hach, Loveland, Co); Fe(II) content was measured with a ferrozine assay; and all other  
131 ion concentrations were measured by inductively coupled plasma mass spectrometry (ICP-MS)  
132 on HCl extractions. Aerobic metabolism was determined with a resazurin reduction assay,  
133 modified from *Haggerty et al.* [2009].

134



135 2.4. *Fourier transform ion cyclotron resonance mass spectrometry solvent extraction and data*  
136 *acquisition*

137 We leveraged state of science chemical extraction protocols combined with Electrospray  
138 ionization (ESI) and Fourier transform ion cyclotron resonance (FTICR) mass spectrometry  
139 (MS) to infer differences in OC character among our samples. Previously, *Tfaily et al.* [2015;  
140 2017] demonstrated the optimization of OC characterization from soils and sediments by  
141 sequential extraction with polar and non-polar solvents tailored to the sample set of interest.  
142 *Tfaily et al.*'s extraction procedures have been coupled to ESI FTICR-MS to distinguish OC  
143 pools among ecosystems and soil types [*Tfaily et al.*, 2015; *Tfaily et al.*, 2017] as well as to  
144 provide information on the metabolism of distinct OC pools among samples within a single  
145 environment [*Bailey et al.*, 2017]. Other common OC characterization methods such as nuclear  
146 magnetic resonance spectroscopy (NMR), Fourier transform infrared spectroscopy (FTIR), and  
147 gas chromatography MS only analyze a limited number of compound classes [*Kögel-Knabner*,  
148 2002; *Kögel-Knabner*, 2000]. In contrast, ESI FTICR-MS introduces intact organic molecules  
149 into the MS without fragmentation and allows for the detection of a wide range of chemical  
150 compounds [*Tfaily et al.*, 2015; *Tfaily et al.*, 2017]. The use of 12 Tesla (T) FTICR-MS offers  
151 high mass resolving power (>1M) and mass measurement accuracy (<1 ppm), and while nascent  
152 in its application within complex environmental systems, it has emerged as a robust method for  
153 determining OC chemistry of natural organic matter [*Kim et al.*, 2003; *Koch et al.*, 2005; *Tfaily*  
154 *et al.*, 2011; *Tremblay et al.*, 2007]. Moreover, *Tfaily et al.* [2015; 2017] demonstrated that  
155 sequential extraction with targeted solvents can preferentially select OC pools with differing  
156 chemical character (*e.g.*, lipid-like vs. carbohydrate-like).

157           Here, we used three solvents with different polarities —water (H<sub>2</sub>O), methanol (CH<sub>3</sub>OH,  
158 hereafter “MeOH”) and chloroform (CHCl<sub>3</sub>)—to sequentially extract a large diversity of organic  
159 compounds from samples, according to *Tfaily et al.* [2015; 2017]. Water extractions were  
160 performed first, followed by MeOH and then CHCl<sub>3</sub>. Previous work has shown that each solvent  
161 is selective towards specific types of compounds [*Tfaily et al.*, 2015]. Water is a polar solvent  
162 with a selection bias for carbohydrates with high O/C ratios, amino-sugars, and other labile polar  
163 compounds [*Tfaily et al.*, 2015]; and, as nearshore environments frequently experience wetting,  
164 water extractions represent an estimation of readily accessible OC compounds in these  
165 environments. Conversely, CHCl<sub>3</sub> is selective for non-polar lipids associated with mineral  
166 interactions and cellular membranes (*i.e.*, physically-bound OC) [*Tfaily et al.*, 2015]. Because  
167 MeOH has a polarity in between that of water and CHCl<sub>3</sub>, it extracts both water-soluble and  
168 bound-OC pools (*i.e.*, a mix of compounds that water and CHCl<sub>3</sub> extract), and *Tfaily et al.* [2015]  
169 demonstrated compositional overlap between water-soluble and MeOH extracted OC pools. In  
170 this study, we are interested in the differences in OC composition between pure water-soluble  
171 and bound-OC pools, and we focus our discussion on H<sub>2</sub>O- and CHCl<sub>3</sub>-extractions only. We use  
172 H<sub>2</sub>O- and CHCl<sub>3</sub>-extracted OC as proxies for readily bioavailable (*i.e.*, weakly bound) vs. less  
173 bioavailable (*i.e.*, mineral- and microbial-bound) pools, respectively.

174           Extracts were prepared by adding 1 ml of solvent to 100 mg bulk sediment and shaking in  
175 2 mL capped glass vials for two hours on an Eppendorf Thermomixer. Samples were removed  
176 from the shaker and left to stand before spinning down and pulling off the supernatant to stop the  
177 extraction. The residual sediment was dried with nitrogen gas to remove any remaining solvent,  
178 and then the next solvent was added. The CHCl<sub>3</sub> and H<sub>2</sub>O extracts were diluted in MeOH to  
179 improve ESI efficiency. *Tfaily et al.* [2015] estimated the OC extraction efficiency to be ~15%.

180 *Tfaily et al.* [2015] have previously demonstrated extraction efficiencies as low as 2% to be  
181 representative of OC pool composition. We further note that numerous studies have established  
182 FTICR-MS as a robust method for distinguishing compositional differences among OC pools  
183 [*Herzprung et al.*, 2017; *Kellerman et al.*, 2015; *Rossel et al.*, 2016; *Ward and Cory*, 2015;  
184 *Zhang et al.*, 2016].

185 Ultra-high resolution mass spectrometry of the three different extracts from each sample  
186 was carried out using a 12 Tesla Bruker Solarix FTICR-MS located at the Environmental  
187 Molecular Sciences Laboratory (EMSL) in Richland, WA, USA. As per *Tfaily et al.* [2017], we  
188 performed weekly calibration using a tuning solution containing C<sub>2</sub>F<sub>3</sub>O<sub>2</sub>, C<sub>6</sub>HF<sub>9</sub>N<sub>3</sub>O,  
189 C<sub>12</sub>HF<sub>21</sub>N<sub>3</sub>O, C<sub>20</sub>H<sub>18</sub>F<sub>27</sub>N<sub>3</sub>O<sub>8</sub>P<sub>3</sub>, and C<sub>26</sub>H<sub>18</sub>F<sub>39</sub>N<sub>3</sub>O<sub>8</sub>P<sub>3</sub> with *m/z* ranging from 112 to 1333  
190 (Agilent Technologies, Santa Clara, CA USA). Instrument settings were optimized using  
191 Suwannee River Fulvic Acid (IHSS). The instrument was flushed between samples using a  
192 mixture of water and methanol. Blanks were analyzed at the beginning and the end of the day to  
193 monitor for background contaminants.

194 The extracts were injected directly into the mass spectrometer, and the ion accumulation  
195 time was optimized for all samples to account for differences in OC concentration. The ion  
196 accumulation time ranged between 0.5 and 1s. A standard Bruker electrospray ionization (ESI)  
197 source was used to generate negatively charged molecular ions. Samples were introduced to the  
198 ESI source equipped with a fused silica tube (30 μm i.d.) through an Agilent 1200 series pump  
199 (Agilent Technologies) at a flow rate of 3.0 μL min<sup>-1</sup>. Experimental conditions were as follows:  
200 needle voltage, +4.4 kV; Q1 set to 50 *m/z*; and the heated resistively coated glass capillary  
201 operated at 180 °C. One hundred forty-four individual scans were averaged for each sample and  
202 internally calibrated using an organic matter homologous series separated by 14 Da (-CH<sub>2</sub>

203 groups). The mass measurement accuracy was less than 1 ppm for singly charged ions across a  
204 broad  $m/z$  range (100-1200  $m/z$ ). The mass resolution was  $\sim 350K$  at 339  $m/z$ .

205

## 206 *2.5 FTICR-MS data processing*

207 A depiction of our FTICR-MS data processing pipeline is presented in Figure 2 and  
208 described in the following sections.

209

### 210 *2.5.1 Chemical formulae assignment*

211 BrukerDaltonik software version 4.2 was used to convert raw spectra to a list of  $m/z$   
212 values applying FTMS peak picker module with a signal-to-noise ratio (S/N) threshold set to 7  
213 and absolute intensity threshold to the default value of 100. Putative chemical formulae were  
214 then assigned using in-house software following the Compound Identification Algorithm (CIA),  
215 proposed by *Kujawinski and Behn* [2006], modified by *Minor et al.* [2012], and previously  
216 described in *Tfaily et al.* [2017]. Chemical formulae were assigned based on the following  
217 criteria:  $S/N > 7$ , and mass measurement error  $< 1$  ppm, taking into consideration the presence of  
218 C, H, O, N, S and P and excluding other elements. To ensure consistent formula assignment, we  
219 aligned all sample peak lists for the entire dataset to each other in order to facilitate consistent  
220 peak assignments and eliminate possible mass shifts that would impact formula assignment. We  
221 implemented the following rules to further ensure consistent formula assignment: (1)  
222 consistently pick the formula with the lowest error and with the lowest number of heteroatoms  
223 and (2) assignment of one phosphorus atom requires the presence of at least four oxygen atoms.

224

### 225 *2.5.2 Identification of putative biochemical transformations using FTICR-MS*

226 To identify potential biochemical transformations, we followed the procedure detailed by  
227 *Breitling et al.* [2006] and employed by *Bailey et al.* [2017]. In essence, the mass difference  
228 between m/z peaks extracted from each spectrum with S/N>7 were compared to commonly  
229 observed mass differences associated with biochemical transformations. All possible pairwise  
230 mass differences were calculated within each extraction type for each sample, and differences  
231 (within 1ppm) were matched to a list of 92 common biochemical transformations (*e.g.*, gain or  
232 loss of amino groups or sugars, Table S1). For example, a mass difference of 99.07 corresponds  
233 to a gain or loss of the amino acid valine, while a difference of 179.06 corresponds to the gain or  
234 loss of a glucose molecule. Pairs of peaks with a mass difference within 1 ppm of our  
235 transformation list were considered to be related by the corresponding compound. This approach  
236 is feasible with FTICR-MS data because the set of peaks in each sample are related by  
237 measureable and clearly defined mass differences corresponding to gains and losses of  
238 compounds. It has been previously used by *Bailey et al.* [2017] to demonstrate differences in  
239 biochemical transformations among soils incubated with different microbial inocula and among  
240 pore size classes in complex soil matrices.

241

### 242 *2.5.3 Identification of putative microbial metabolic pathways using FTICR-MS*

243 Additionally, a set of putative microbial metabolic pathways in each sample can be  
244 identified by locating chemical formulae assigned to m/z's within metabolic pathways defined in  
245 the Kyoto Encyclopedia of Genes and Genomes (KEGG, Release, 80.0, <http://www.kegg.jp>)  
246 [*Kanehisa and Goto*, 2000]. Chemical formulae were mapped to KEGG pathways using an in-  
247 house software to detect all KEGG pathways containing a giving formula. For example, a peak  
248 with a mass of 400.3356 was assigned formula C<sub>20</sub>H<sub>16</sub>O<sub>9</sub> and mapped to KEGG pathway

249 ‘map00254’ (Aflatoxin biosynthesis) which contains C<sub>20</sub>H<sub>16</sub>O<sub>9</sub> as an intermediate. While only a  
250 subset of compounds detected by FTICR-MS are defined within the KEGG database (*i.e.*, peaks  
251 must be assigned a chemical formula and that chemical formula must be present in a KEGG  
252 pathway), we found 415 unique peaks that were assigned putative molecular formulae *and* that  
253 corresponded to compounds present in KEGG pathways. Additionally, we defined assignments  
254 at the pathway level (*i.e.*, by “map” number) instead of using enzyme level classification (*i.e.*,  
255 EC number) in order to aggregate compounds found within the same pathways. This was done to  
256 facilitate functional interpretation.

257         Although we acknowledge our results do not represent a comprehensive analysis of all  
258 microbial metabolic pathways present in a sample, we assume that KEGG pathways containing  
259 more peaks detected by FTICR-MS within a sample are more likely to be active than those with  
260 fewer mapped peaks. We further reduced possible random matches by assessing correlations  
261 with aerobic metabolisms as described in the ‘Statistical Methods’ section below, and we  
262 compare results across samples to yield insight into microbial pathways in each sample beyond  
263 that which can be garnered from biochemical transformations. The results are, however,  
264 conceptually congruent with those derived from the biochemical transformation analyses  
265 described in the preceding sub-section. The KEGG pathway and transformation analyses are  
266 independent of each other, yet provided consistent insights, and thus together they provide  
267 greater confidence in our interpretations.

268

## 269 *2.6 Statistical Methods*

270         All statistical analyses were conducted using R software (<https://www.r-project.org/>).  
271 FTICR m/z intensities were converted into presence/absence data prior to analysis because

272 differences in m/z intensity are influenced by ionization efficiency as well as relative abundance  
273 [Kujawinski and Behn, 2006; Minor et al., 2012; Tfaily et al., 2015; Tfaily et al., 2017].

274 To examine differences in OC composition between transects, we used the ‘vegan’  
275 package to construct a Sorenson dissimilarity matrix for all m/z’s identified (*i.e.*, we included  
276 peaks with or without assigned formula) within each OC pool (water-soluble or  
277 physicallybound). Differences between vegetation states (*i.e.*, V vs. NV) were tested with  
278 PERMANOVA with permutations stratified by depth to account for non-independence among  
279 samples from the same core (999 permutations, ‘vegan’) and visualized using Non-metric  
280 Multidimensional Scaling (NMDS, ‘vegan’). One sample (NV, upper profile, depth 30-40cm)  
281 was removed due to peak interference during FTICR-MS, and three samples (NV, middle  
282 profile, depths 00-10cm, 10-20cm, 20-30cm) were excluded, because we were unable to collect  
283 sufficient sample mass for all analyses.

284 To reveal transformations associated with aerobic metabolism and to study differences in  
285 those transformations across vegetation states, we determined the number of times a given  
286 transformation occurred within each OC pool in each sample. Specifically, for each of the 92  
287 compounds in our set of biochemical transformations, we counted the number of times in each  
288 sample that transformation was observed to yield an estimate of the prevalence or ‘abundance’ of  
289 each transformation in each sample. We correlated these abundance estimates to rates of  
290 metabolism using linear mixed models in which transformations were a fixed effect and depth  
291 was a random effect. Mixed models were compared to null expectations (*i.e.*, models including  
292 only random effects) with ANOVA to determine significance. Significant relationships were  
293 interpreted as biochemical transformations possibly associated with biotic OC oxidation. To  
294 evaluate how transformations associated with OC oxidation varied across vegetation states, we

295 used the abundances of those transformations across all samples to calculate Bray-Curtis  
296 dissimilarity. Resulting Bray-Curtis dissimilarities were used to visualize multivariate  
297 differences among samples using non-metric Multidimensional Scaling (NMDS, ‘vegan’), and  
298 we statistically evaluated separation between vegetation states with PERMANOVA (999  
299 permutations stratified by depth, ‘vegan’). We refer to H<sub>2</sub>O- and CHCl<sub>3</sub>-soluble OC pools at V  
300 and NV, respectively, as V-W (‘vegetated water’), V-B (‘vegetated bound’), NV-W (‘not  
301 vegetated water’), and NV-B (‘not vegetated bound’) for the remainder of the manuscript.

302         Similar to our analyses of biochemical transformations, we found the number of m/z’s  
303 that mapped to a given KEGG pathway. We make the assumption that pathways with more m/z’s  
304 mapped to them have a higher probability of actively contributing to biogeochemical function.  
305 To identify which pathways were most likely to contribute to aerobic metabolism, we tested the  
306 relationship between the number of m/z’s mapped to a given KEGG pathway within each sample  
307 and aerobic metabolism using linear mixed models with depth as a random variable as per our  
308 analyses of biochemical transformations. Pathways with significant relationships were  
309 interpreted as influencing OC oxidation, and the following analysis was conducted only with  
310 those pathways. To estimate relative abundances, the number of peaks mapping to each KEGG  
311 pathway in a sample was normalized by the total number of peaks mapping to any KEGG  
312 pathway (within the sample) that was significantly related to aerobic metabolism. To reveal  
313 groups of pathways co-varying with each other across vegetation states and OC pools, we  
314 statistically clustered pathways that correlated with aerobic metabolism. Clustering was based on  
315 pathway relative abundances in each vegetation state and pool type. Clusters were determined  
316 using the ‘hclust’ algorithm in R with the ‘complete linkage’ clustering method and visualized  
317 using the ‘pheatmap’ package.



318 Finally, we examined associations between aerobic metabolism and OC thermodynamics  
319 by calculating the Gibbs Free Energy of OC oxidation under standard conditions ( $\Delta G^{\circ}_{\text{Cox}}$ ) from  
320 the Nominal Oxidation State of Carbon (NOSC) as per *La Rowe and Van Cappellen* [2011].  
321 NOSC was calculated from the number of electrons transferred in OC oxidation half reactions  
322 and is defined by the equation:

$$323 \quad (1) \text{NOSC} = -((-Z + 4a + b - 3c - 2d + 5e - 2f)/a) + 4$$

324 , where a, b, c, d, e, and f are, respectively, the numbers of C, H, N, O, P, S atoms in a given  
325 organic molecule and Z is net charge of the organic molecule (assumed to be 1). In turn,  $\Delta G^{\circ}_{\text{Cox}}$   
326 was estimated from NOSC following *La Rowe and Van Cappellen* [2011]:

$$327 \quad (2) \Delta G^{\circ}_{\text{Cox}} = 60.3 - 28.5(\text{NOSC})$$

328 Values of  $\Delta G^{\circ}_{\text{Cox}}$  are generally positive, indicating that OC oxidation must be coupled to the  
329 reduction of a terminal electron acceptor. While  $\Delta G^{\circ}_{\text{Cox}}$  varies according to the availability of  
330 terminal electron acceptors, our system is primarily oxic, allowing us to infer oxygen as the  
331 primary electron acceptor in most reactions and make direct comparisons across samples.  
332 Additionally, though the exact calculation of  $\Delta G^{\circ}_{\text{Cox}}$  necessitates an accurate quantification of all  
333 species involved in every chemical reaction in a sample, the use of NOSC as a practical basis for  
334 determining  $\Delta G^{\circ}_{\text{Cox}}$  has been validated [*Arndt et al.*, 2013; *LaRowe and Van Cappellen*, 2011].

335 Here, we assessed relationships between aerobic metabolism and  $\Delta G^{\circ}_{\text{Cox}}$  of OC  
336 compounds identified in each OC pool (determined by FTICR-MS analysis) using linear mixed  
337 models in each vegetation state, in which aerobic metabolism was a fixed effect, depth was a  
338 random effect, and average  $\Delta G^{\circ}_{\text{Cox}}$  of all m/z's with assigned formula was the dependent  
339 variable.

340 We note that we could not account for possible non-independence between the 3 cores  
341 obtained within each transect. Given one replicate per depth per core within each transect, core  
342 identity cannot be accounted for with mixed models, due to identifiability issues in model  
343 estimation, once accounting for depth. However, we emphasize that the locations within each  
344 transect were selected to represent a broad range of conditions within each vegetation state. That  
345 is, higher elevation cores were located near vegetation (vegetated state) or in a mostly barren  
346 cobbled bank (unvegetated state) in locations that submerge seasonally; lower elevation cores  
347 were in locations that are usually submerged below river water and the middle elevation  
348 represented a transitional location (Figure 1). The three positions within each transect therefore  
349 sampled a broad range of conditions with the potential to cause variation in OC composition and  
350 cycling. This sampling design enabled a regression-based analysis.

351 We originally hypothesized that OC composition/cycling would vary continuously across the  
352 broad range of sampled conditions. Our analyses, however, showed that for some key aspects of  
353 the data, the two sites grouped together instead of showing continuous variation. That is, despite  
354 within-transect variation in the physical environment, we observed coherence in OC  
355 composition/cycling within each transect. In turn, we provisionally infer that the presence or  
356 absence of riparian vegetation strongly constrained OC composition/cycling within the hyporheic  
357 zone of our system. The inference is made possible by the two transects being near each other  
358 such that most other features of the study system were similar between the two transects (e.g.,  
359 aqueous chemistries, hydrology, mineralogy, temperature, light cycles, etc.). The major feature  
360 distinguishing the two transects was the presence or absence of riparian vegetation. However, as  
361 noted above, we consider our inferences to be foundational for future studies because we did not  
362 sampling multiple plots within each vegetated state.

363

### 364 **3. Results and Discussion**

#### 365 *3.1. Shifts in physicochemical, metabolic, and OC character between vegetation states*

366 Differences in vegetation states corresponded to differences in physicochemistry, aerobic  
367 metabolism, and OC pool composition. V was characterized by mature trees near the water line  
368 and was nutrient-rich relative to NV (Figure S1-3). V displayed comparatively high  
369 concentrations of total C and rates of aerobic metabolism (Figure S1-3). In contrast, NV  
370 consisted of vegetation-free, cobble-ridden shoreline with sandier soils, low total C, and low  
371 aerobic metabolism (Figure S1-3).

372 Compositional difference in OC pools indicated a possibility for distinct OC oxidation  
373 processes between the vegetation states (Figure 3, PERMANOVA,  $P = 0.001$  in both water-  
374 soluble and bound-OC pools). If each pool contained similar OC compounds, one might infer  
375 similar OC inputs and biochemical processing in each vegetation state. Differences in OC pool  
376 composition within each vegetation state therefore putatively denotes either variation in OC  
377 inputs and/or variation in OC processing. Additionally, total OC content explained only 42% of  
378 aerobic metabolic rates across both sites ( $R^2 = 0.42$ ,  $P = 0.0009$ ) and had no significant influence  
379 on metabolism within each site (V:  $P = 0.69$ , NV:  $P = 0.10$ , Figure S4). This suggests that factors  
380 beyond bulk OC content influenced aerobic metabolism. We hypothesized that variation in OC  
381 composition was responsible for variation in aerobic metabolism within each vegetation state.  
382 The following sections explore this possibility.

383

#### 384 *3.2. Associations between C transformations and aerobic metabolism*

385           Given compositional differences in OC between vegetation states and known impacts of  
386 C chemistry on metabolic functioning in other systems [*Castle et al.*, 2016; *Graham et al.*,  
387 2016b], we hypothesized that biochemical transformations that were related to rates of aerobic  
388 metabolism would be unique to each vegetation state.

389           Consistent with this hypothesis, transformation analysis indicated that the biochemical  
390 processes associated with OC oxidation were significantly different between the vegetation  
391 states. Specifically, OC transformations correlated to aerobic metabolism were significantly  
392 different at each vegetation state (PERMANOVA, H<sub>2</sub>O P = 0.005 and CHCl<sub>3</sub> P = 0.001, Figure 4  
393 a-b, Table 2). In comparing differences in transformations occurring within the water-soluble OC  
394 pool, we observed higher abundances of amino- and sugar-associated transformations for V-W  
395 relative to NV-W. Twenty-six and four of these transformations co-varied significantly with  
396 aerobic metabolism in V-W and NV-W, respectively. These V-W transformations were primarily  
397 associated with simple C molecules (*e.g.*, glucose, Table 2). Conversely, within the bound-OC  
398 pool, 35 transformations co-varied with aerobic metabolism in NV-B, compared to only three in  
399 V-B. In both cases, transformations associated with bound-OC consisted of a greater proportion  
400 of complex C molecules (*e.g.*, biotinylation, palmitoylation, and glyoxylate, Table 2) than in water-  
401 soluble pools.

402           The larger number of transformations associated with aerobic metabolism in V-W vs. V-  
403 B, and the larger number in NV-B vs. NV-W, suggests that aerobic metabolism in vegetated and  
404 unvegetated areas depend on water-soluble and bound-OC pools, respectively. We note some  
405 oxidation of the bound-OC pool under vegetated conditions, but only three correlations were  
406 observed between V-B transformations and aerobic metabolism, suggesting a relatively minor  
407 role, especially considering that there were 35 significant correlations for NV-B.

408           These differences suggest that an increased supply of bioavailable compounds in  
409 vegetated areas leads to bound-OC being less involved in aerobic metabolism, relative to  
410 unvegetated areas where bound-OC appears to be heavily involved in aerobic metabolism. The  
411 concept of priming [Kuzuyakov, 2010] would predict the opposite pattern; a greater supply of  
412 bioavailable OC should increase the contributions of less bioavailable OC (here, bound-OC) to  
413 aerobic metabolism. Our results run counter to a priming mechanism and indicate that the supply  
414 of bioavailable compounds diminishes the contribution of bound-OC to aerobic metabolism and,  
415 in turn, protects bound-OC pools. Conversely, metabolism of bound-OC pools in locations  
416 without riparian vegetation possibly denotes microbial adaptations to a low-C environment that  
417 supports the oxidation of mineral-bound OC. Mineral-bound OC therefore has greater potential  
418 to remain sequestered along river corridors with spatially and temporally consistent inputs of  
419 bioavailable OC, potentially derived from riparian vegetation.

420

### 421 *3.3. Associations between microbial metabolic pathways and aerobic metabolism*

422           Because we observed stark differences in the identity of OC transformations that  
423 correlated with aerobic metabolism across vegetation states, we hypothesized that the microbial  
424 metabolic pathways associated with OC transformations were also dependent on vegetation state.  
425 Indeed, pathways associated with OC oxidation were distinct at V vs. NV, supporting our  
426 hypothesis that there were differences in the metabolic processing of OC in the presence or  
427 absence of riparian vegetation. Specifically, while the metabolism of plant-derived compounds  
428 appeared to be a major driver of aerobic respiration at both vegetation states, metabolism at V  
429 mostly involved readily bioavailable plant derivatives in the water-soluble OC pool, and  
430 metabolism at NV was associated with plant derivatives in the bound-OC pool (Figure 5).

431 In V-W, pathways that corresponded to aerobic metabolism included map01110  
432 biosynthesis of secondary metabolites, map000941 flavonoid biosynthesis, and map00944  
433 flavone and flavonol biosynthesis, among others (see Figure 5a). Each of these pathways denotes  
434 an association between plant-derived compounds and OC oxidation in sediments. Secondary  
435 metabolites (map01110) are largely comprised of plant-derived compounds such as flavonoids  
436 [Agati *et al.*, 2012], terpenoids [Tholl, 2015], and nitrogen-containing alkaloids [Willaman and  
437 Schubert, 1961], while flavonoids [Agati *et al.*, 2012] are one of the most abundant plant-derived  
438 compounds. Associations with flavone/flavonol [Agati *et al.*, 2012] and phenylpropanoids  
439 [Hahlbrock and Scheel, 1989] bolster a possible relationship between plant-associated  
440 metabolites and aerobic metabolism in V-W.

441 Although correlations between plant-associated KEGG pathways and aerobic metabolism  
442 could indicate the persistence of plant secondary metabolites rather than microbial metabolism,  
443 our results indicate a central role for vegetation in water-soluble OC oxidation in either case. For  
444 example, if KEGG associations were attributable to plant metabolism instead of microbial  
445 metabolism, correlations between plant-associated pathways and aerobic metabolism in V-W  
446 would indicate an indirect relationship between plant growth and microbial oxidation of OC,  
447 whereby plant byproducts support microbial communities in oxidizing other portions of the OC  
448 pool.

449 Pathways correlated with aerobic metabolism in NV-W or V-W had some overlap, but  
450 were mostly distinct from each other (Figure 5a). Although some correlations in NV-W indicated  
451 associations between plant-associated metabolic pathways and OC oxidation (*e.g.*, map01110),  
452 relationships also indicated the involvement of broad metabolic processes including membrane  
453 transport (map02010 ABC transporters), carbohydrate metabolism (map00010

454 Glycolysis/Gluconeogenesis), and lipid metabolism (map00061 Fatty acid biosynthesis and  
455 map01040 Biosynthesis of unsaturated fatty acids). We propose that these associations indicate  
456 utilization of alternative resources in comparison to V-W, in which relationships almost  
457 exclusively denoted the metabolism of readily bioavailable plant byproducts. In particular, we  
458 note correlations in NV-W between OC oxidation and lipid-based molecules (map00061 and  
459 map01040) that are typically poorly-represented in water-soluble OC pools.

460 We also observed largely distinct relationships between metabolisms and OC oxidation in  
461 V-B versus NV-B. The lipid-based and plant-associated pathway map00073 (Cutin, suberine,  
462 and wax biosynthesis [*King et al.*, 2007; *Raffaele et al.*, 2009; *Shepherd and Wynne Griffiths*,  
463 2006]) comprised almost 35% of relationships in NV-B, and more generic plant-associated  
464 pathways such as map01060 (Biosynthesis of plant secondary metabolites) and map01110  
465 (Biosynthesis of secondary metabolites) were also prevalent (Figure 5b). Conversely in V-B, the  
466 most abundant associations were non-lipid metabolisms map00590 (Arachidonic acid  
467 metabolism) and map01100 (Metabolic pathways).

468 Together, our results indicate largely separate metabolic processes occurring in each of  
469 the water-soluble and bound-OC pools in V and NV. Because of the abundance of lipid-based  
470 metabolisms correlated to OC oxidation at NV (in both OC pools), we further hypothesize that  
471 these metabolisms comprise the primary KEGG-identifiable pathways associated with OC  
472 oxidation in areas without riparian vegetation. This contrasts to the cycling of a more diverse  
473 range of secondary metabolite classes in areas with more significant OC inputs from riparian  
474 vegetation. We note that correlations between KEGG pathways and aerobic metabolism in V-B  
475 indicates less oxidation of lipid plant material in the bound-OC pool under vegetated conditions  
476 than in NV-B. We therefore propose that plant-derived lipid compounds serve as a secondary

477 substrate for OC oxidation in shorelines with riparian vegetation, given that more correlations at  
478 V were detected in the water-soluble pool.

479

### 480 *3.4. Thermodynamics of carbon oxidation*

481 Finally, we hypothesized that microbes would preferentially oxidize more  
482 thermodynamically favorable compounds at both sites, consistent with common thermodynamic  
483 constraints on biogeochemical cycles [*Burgin et al.*, 2011; *Hedin et al.*, 1998; *Helton et al.*,  
484 2015]. Because we observed evidence for preferential OC oxidation of the water-soluble OC  
485 pool at V and of the bound-OC pool at NV, we further hypothesized that thermodynamic-based  
486 preference of OC oxidation would be observable only in the preferred substrate pool within each  
487 vegetation state. Consistent with this hypothesis, aerobic metabolism was positively correlated to  
488 average  $\Delta G^{\circ}_{\text{Cox}}$  in V-W ( $R^2 = 0.37$ ,  $P = 0.008$ , Figure 6a) and NV-B ( $R^2 = 0.59$ ,  $P = 0.0005$   
489 Figure 6b), but these variables were not correlated in V-B or NV-W. In both cases, aerobic  
490 metabolism corresponded to a depletion of more thermodynamically favorable OC (*i.e.*, OC  
491 became less favorable as aerobic metabolism increased), resulting in progressively less favorable  
492 thermodynamic conditions.

493 The priming conceptual framework would predict that terrestrial inputs associated with  
494 riparian vegetation should condition microbial communities to oxidize less thermodynamically  
495 favorable C, such as that found in the bound-OC pool. In such a scenario, inputs of  
496 thermodynamically favorable carbon should—by minimizing community-level energy  
497 constraints—allow for the rise of microbial physiologies that can oxidize less favorable C  
498 [*Kuzuyakov*, 2010]. In this case, a significant relationship between thermodynamic favorability  
499 and aerobic metabolism in the V-W pool should lead to a similar relationship within the V-B



500 pool. Our results reveal a strong relationship within the V-W pool, but not in the V-B pool,  
501 thereby rejecting an influence of priming. Instead, our results suggest that bound-OC pools are  
502 protected by thermodynamically favorable compounds that serve as preferred substrate.

503 In contrast to our expectation that water-soluble OC associated with riparian vegetation  
504 would increase oxidation of bound-OC pools, we observed evidence consistent with inhibition of  
505 bound-OC oxidation by thermodynamically favorable water-soluble compounds. Priming has  
506 been actively debated in aquatic research [*Bengtsson et al.*, 2014; *Bianchi*, 2011; *Guenet et al.*,  
507 2010], and a number of other studies have been unable to detect a priming effect in sediment and  
508 aqueous habitats [*Bengtsson et al.*, 2014; *Catalán et al.*, 2015].

509

### 510 *3.5. Conceptual model for OC oxidation at terrestrial-aquatic interfaces*

511 Based on our work, we propose a new view of OC oxidation along terrestrial-aquatic  
512 interfaces in which the oxidation of bound-OC is limited by terrestrial inputs from riparian  
513 vegetation (Figure 7). While our work represents a single system, our conceptual model is  
514 derived from ultra-high resolution measurements that provide greater mechanistic insight into  
515 OC cycles than traditional measures. Our model is therefore meant to provide a basis for more  
516 spatially extensive experiments that will allow for broader transferability.

517 We hypothesize that riparian vegetation sustains inputs of water-soluble compounds to  
518 nearshore OC pools, resulting in a larger thermodynamically favorable, water-soluble OC pool  
519 (Figure 7b). This leads to higher overall C content in nearshore sediments and elevated rates of  
520 aerobic respiration relative to areas with less riparian vegetation. Our data also suggest that in the  
521 presence of riparian vegetation, microbial carbon oxidation primarily uses the water-soluble OC  
522 pool with minimal oxidation of bound-OC due to physical and/or thermodynamic protection of

523 this pool. For instance,  $\Delta G^{\circ}_{\text{Cox}}$  was lower in water-soluble OC pools than in bound-OC, and a  
524 large presence of this thermodynamically favorable pool may provide adequate substrate to  
525 sustain metabolic functioning, limiting the need to metabolize less thermodynamically favorable  
526 OC. Additionally, organomineral interactions can protect bound-OC from extracellular enzyme  
527 activity [Hunter *et al.*, 2016], inhibiting the bioavailability of OC.

528 In contrast, non-vegetated riparian zones provide little input into water-soluble OC pools  
529 (Figure 7a), and rates of metabolism and C pool sizes are lower in these environments. Carbon  
530 oxidation in these non-vegetated zones occurs primarily within the bound-OC pool, albeit more  
531 slowly and as product of different biochemical and metabolic pathways than in vegetated  
532 environments (*e.g.*, complex C transformations and lipid-based metabolism of plant derivatives  
533 at NV). We posit that water-soluble pools in non-vegetated sediments are sufficiently small that  
534 investing in enzymes needed to metabolize this OC pool results in a net energy loss. Instead,  
535 microbes in unvegetated areas must invest in cellular machinery to access bound-OC, and our  
536 results imply that the cellular machinery needed to access bound-OC is distinct from the  
537 machinery needed to access water-soluble OC.

538 Interestingly, aerobic metabolism within both types of sediments is related to a depletion  
539 of thermodynamically favorable compounds; however, this occurs in water-soluble OC pools in  
540 vegetated zones and bound-OC pools in non-vegetated zones. That is, microorganisms in both  
541 environments are constrained to the metabolism of their primary substrate pool but preferentially  
542 oxidize more thermodynamically favorable compounds within that pool. This suggests that  
543 microorganisms are conditioned to metabolize a subset of compounds within sediment OC,  
544 possibly defined by thermodynamic or physical protection mechanisms, but operate under  
545 common thermodynamic constraints once adapted to oxidize a certain OC pool.

546

547 *3.6. Broader Implications*

548 Our work is particularly relevant to CO<sub>2</sub> emissions in light of changes in land cover and  
549 precipitation, and the influence of these perturbations to on C fluxes across terrestrial-aquatic  
550 interfaces. Carbon moving across terrestrial-aquatic interfaces has been examined primarily for  
551 its propensity to be oxidized along land-to-sea continuums [*Battin et al.*, 2008; *Battin et al.*,  
552 2009; *Regnier et al.*, 2013], but we suggest that this terrestrially-derived OC also has important  
553 influences on stabilizing mineral-bound OC within nearshore environments. The magnitude,  
554 distribution, and chemical quality of terrestrial C fluxes into aquatic environments are perturbed  
555 by shifts in land cover [*Fang et al.*, 2005; *Knapp et al.*, 2008]. Furthermore, vegetation  
556 distributions in natural ecosystems are predicted to shift in response to altered precipitation  
557 regimes. Associated changes in plant phenology, morphology, and establishment will impact the  
558 quantity, quality, and distribution of terrestrial material entering aquatic systems [*Knapp et al.*,  
559 2008], and we currently have an incomplete understanding of how these patterns will vary across  
560 ecosystems and precipitation patterns [*Fang et al.*, 2005; *Knapp et al.*, 2008]. A mechanistic  
561 framework for C oxidation that captures impacts of heterogeneity in vegetation in river corridors  
562 will therefore aid in predicting how terrestrial-aquatic interfaces respond to ongoing  
563 perturbations. Here, we demonstrate that increases in the flux of terrestrial C to aquatic systems  
564 may lead to larger mineral-bound C pools by physically and thermodynamically protecting these  
565 pools. Conversely, we demonstrate a potential for oxidation of mineral-bound C pools in areas  
566 with diminished terrestrial C inputs.

567 Earth System Models (ESMs) depend on mathematical representations of C cycling, and  
568 the continued development of these models is tightly coupled to conceptual advances drawn

569 from field-based observations [*Burd et al.*, 2016; *Six et al.*, 2002]. Despite recent progress, these  
570 models are still missing key regulatory processes [*Todd-Brown et al.*, 2013; *Wieder et al.*, 2013;  
571 *Wieder et al.*, 2015]. In particular, terrestrial-aquatic interfaces are now considered to be active  
572 zones of OC transformation as opposed to their representation as non-reactive ‘pipes’ in most  
573 ESMs. To address this knowledge gap, we propose a new conceptual framework of OC  
574 dynamics based on analysis of *in situ* observational data that explicitly considers a central  
575 challenge in model improvement—biochemical, metabolic, and thermodynamic mechanisms  
576 governing OC oxidation along terrestrial-aquatic interfaces. Our results directly contrast those  
577 expected within a ‘priming’ framework, and we advance that water-soluble thermodynamically  
578 favorable OC associated with riparian vegetation protects thermodynamically less favorable  
579 bound-OC from oxidation. We also demonstrate differences in biochemical and metabolic  
580 pathways associated with metabolism of water-soluble and bound-OC pools in the presence or  
581 absence of riparian vegetation, furthering a process-based understanding of terrestrial-aquatic  
582 interfaces. Our research provides an opportunity to enhance the mechanistic underpinning of OC  
583 oxidation process representations within ESMs and proposes interactions between OC  
584 thermodynamics and mineral-inhibition of OC oxidation as a key future research need.

585

#### 586 **Author Contributions.**

587 EBG was responsible for conceptual development and data analysis and was the primary writer  
588 with guidance from JCS and MT. ARC, AEG, CTR, ECR, DWK, and JCS were responsible for  
589 experimental design and data collection. MT was responsible for all FTICR processing, and LB  
590 assisted with data analysis. All authors contributed to manuscript revisions.

591

592 **Acknowledgements.**

593 This research was supported by the US Department of Energy (DOE), Office of  
594 Biological and Environmental Research (BER), as part of Subsurface Biogeochemical  
595 Research Program's Scientific Focus Area (SFA) at Pacific Northwest National  
596 Laboratory (PNNL). PNNL is operated for DOE by Battelle under contract  
597 DE-AC06-76RLO 1830. A portion of the research was performed at the Environmental  
598 Molecular Science Laboratory User Facility located on PNNL's campus. We thank Nancy Hess  
599 for helpful feedback in manuscript revision and Jeff Holmes for assistance in text editing. All  
600 data are publicly available at DOI XXXXXXXX.

601

602 **References.**

603

604 Aalto, R., L. Maurice-Bourgoin, T. Dunne, D. R. Montgomery, C. A. Nittrouer, and J.-L. Guyot  
605 (2003), Episodic sediment accumulation on Amazonian flood plains influenced by El  
606 Niño/Southern Oscillation, *Nature*, 425(6957), 493-497.

607 Agati, G., E. Azzarello, S. Pollastri, and M. Tattini (2012), Flavonoids as antioxidants in plants:  
608 location and functional significance, *Plant Science*, 196, 67-76.

609 Arndt, S., B. B. Jørgensen, D. E. LaRowe, J. Middelburg, R. Pancost, and P. Regnier (2013),  
610 Quantifying the degradation of organic matter in marine sediments: a review and synthesis,  
611 *Earth-science reviews*, 123, 53-86.

612 Arntzen, E. V., D. R. Geist, and P. E. Dresel (2006), Effects of fluctuating river flow on  
613 groundwater/surface water mixing in the hyporheic zone of a regulated, large cobble bed river,  
614 *River Research and Applications*, 22(8), 937-946.

615 Bailey, V. L., A. Smith, M. Tfaily, S. J. Fansler, and B. Bond-Lamberty (2017), Differences in  
616 soluble organic carbon chemistry in pore waters sampled from different pore size domains, *Soil*  
617 *Biology and Biochemistry*, 107, 133-143.

618 Battin, T. J., L. A. Kaplan, S. Findlay, C. S. Hopkins, E. Marti, A. I. Packman, J. D. Newbold,  
619 and F. Sabater (2008), Biophysical controls on organic carbon fluxes in fluvial networks, *Nature*  
620 *Geoscience*, 1(2), 95-100.

621 Battin, T. J., S. Luyssaert, L. A. Kaplan, A. K. Aufdenkampe, A. Richter, and L. J. Tranvik  
622 (2009), The boundless carbon cycle, *Nature Geoscience*, 2(9), 598-600.

623 Bengtsson, M. M., K. Wagner, N. R. Burns, E. R. Herberg, W. Wanek, L. A. Kaplan, and T. J.  
624 Battin (2014), No evidence of aquatic priming effects in hyporheic zone microcosms, *Scientific*  
625 *reports*, 4, 5187.

626 Bianchi, T. S. (2011), The role of terrestrially derived organic carbon in the coastal ocean: A  
627 changing paradigm and the priming effect, *Proceedings of the National Academy of Sciences*,  
628 108(49), 19473-19481.

629 Blagodatskaya, E., and Y. Kuzyakov (2008), Mechanisms of real and apparent priming effects  
630 and their dependence on soil microbial biomass and community structure: critical review,  
631 *Biology and Fertility of Soils*, 45(2), 115-131.

632 Breitling, R., S. Ritchie, D. Goodenowe, M. L. Stewart, and M. P. Barrett (2006), Ab initio  
633 prediction of metabolic networks using Fourier transform mass spectrometry data,  
634 *Metabolomics*, 2(3), 155-164.

635 Burd, A. B., S. Frey, A. Cabre, T. Ito, N. M. Levine, C. Lønborg, M. Long, M. Mauritz, R. Q.  
636 Thomas, and B. M. Stephens (2016), Terrestrial and marine perspectives on modeling organic  
637 matter degradation pathways, *Global change biology*, 22(1), 121-136.

638 Burgin, A. J., W. H. Yang, S. K. Hamilton, and W. L. Silver (2011), Beyond carbon and  
639 nitrogen: how the microbial energy economy couples elemental cycles in diverse ecosystems,  
640 *Frontiers in Ecology and the Environment*, 9(1), 44-52.

641 Castle, S. C., D. R. Nemergut, A. S. Grandy, J. W. Leff, E. B. Graham, E. Hood, S. K. Schmidt,  
642 K. Wickings, and C. C. Cleveland (2016), Biogeochemical drivers of microbial community  
643 convergence across actively retreating glaciers, *Soil Biology and Biochemistry*, 101, 74-84.

644 Catalán, N., A. M. Kellerman, H. Peter, F. Carmona, and L. J. Tranvik (2015), Absence of a  
645 priming effect on dissolved organic carbon degradation in lake water, *Limnology and*  
646 *Oceanography*, 60(1), 159-168.

- 647 Cotrufo, M. F., M. D. Wallenstein, C. M. Boot, K. Deneff, and E. Paul (2013), The Microbial  
648 Efficiency - Matrix Stabilization (MEMS) framework integrates plant litter decomposition with  
649 soil organic matter stabilization: do labile plant inputs form stable soil organic matter?, *Global*  
650 *Change Biology*, 19(4), 988-995.
- 651 Dorado-García, I., J. Syväranta, S. P. Devlin, J. M. Medina-Sánchez, and R. I. Jones (2016),  
652 Experimental assessment of a possible microbial priming effect in a humic boreal lake, *Aquatic*  
653 *Sciences*, 78(1), 191-202.
- 654 Ebel, W. J., C. D. Becker, J. W. Mullan, and H. L. Raymond (1989), The Columbia River--  
655 toward a holistic understanding, *Canadian special publication of fisheries and aquatic*  
656 *sciences/Publication speciale canadienne des sciences halieutiques et aquatiques*. 1989.
- 657 Fang, J., S. Piao, L. Zhou, J. He, F. Wei, R. B. Myneni, C. J. Tucker, and K. Tan (2005),  
658 Precipitation patterns alter growth of temperate vegetation, *Geophysical research letters*, 32(21).
- 659 Graham, E. B., A. R. Crump, C. T. Resch, S. Fansler, E. Arntzen, D. W. Kennedy, J. K.  
660 Fredrickson, and J. C. Stegen (2016a), Coupling spatiotemporal community assembly processes  
661 to changes in microbial metabolism, *Frontiers in Microbiology*, 7, 1949.
- 662 Graham, E. B., A. R. Crump, C. T. Resch, S. Fansler, E. Arntzen, D. W. Kennedy, J. K.  
663 Fredrickson, and J. C. Stegen (2017), Deterministic influences exceed dispersal effects on  
664 hydrologically - connected microbiomes, *Environmental Microbiology*, 19(4), 1552-1567.
- 665 Graham, E. B., J. E. Knelman, R. S. Gabor, S. Schooler, D. M. McKnight, and D. Nemergut  
666 (2016b), Dissolved organic matter and inorganic mercury loadings favor novel methylators and  
667 fermentation metabolisms in oligotrophic sediments, *bioRxiv*, 072017.
- 668 Guenet, B., M. Danger, L. Abbadie, and G. Lacroix (2010), Priming effect: bridging the gap  
669 between terrestrial and aquatic ecology, *Ecology*, 91(10), 2850-2861.
- 670 Haggerty, R., E. Martí, A. Argerich, D. Von Schiller, and N. B. Grimm (2009), Resazurin as a  
671 "smart" tracer for quantifying metabolically active transient storage in stream ecosystems,  
672 *Journal of Geophysical Research: Biogeosciences*, 114(G3).
- 673 Hahlbrock, K., and D. Scheel (1989), Physiology and molecular biology of phenylpropanoid  
674 metabolism, *Annual review of plant biology*, 40(1), 347-369.
- 675 Hedges, J., and J. Oades (1997), Comparative organic geochemistries of soils and marine  
676 sediments, *Organic geochemistry*, 27(7), 319-361.
- 677 Hedges, J. I., G. Eglinton, P. G. Hatcher, D. L. Kirchman, C. Arnosti, S. Derenne, R. P.  
678 Evershed, I. Kögel-Knabner, J. De Leeuw, and R. Littke (2000), The molecularly-  
679 uncharacterized component of nonliving organic matter in natural environments, *Organic*  
680 *Geochemistry*, 31(10), 945-958.
- 681 Hedges, J. I., and R. G. Keil (1995), Sedimentary organic matter preservation: an assessment and  
682 speculative synthesis, *Marine chemistry*, 49(2-3), 81-115.
- 683 Hedin, L. O., J. C. von Fischer, N. E. Ostrom, B. P. Kennedy, M. G. Brown, and G. P. Robertson  
684 (1998), Thermodynamic constraints on nitrogen transformations and other  
685 biogeochemical processes at soil-stream interfaces, *Ecology*, 79(2), 684-703.
- 686 Helton, A. M., M. Ardón, and E. S. Bernhardt (2015), Thermodynamic constraints on the utility  
687 of ecological stoichiometry for explaining global biogeochemical patterns, *Ecology letters*,  
688 18(10), 1049-1056.
- 689 Herzsprung, P., K. Osterloh, W. von Tümpling, M. Harir, N. Hertkorn, P. Schmitt-Kopplin, R.  
690 Meissner, S. Bernsdorf, and K. Friese (2017), Differences in DOM of rewetted and natural  
691 peatlands—Results from high-field FT-IFTICR-MS and bulk optical parameters, *Science of The*  
692 *Total Environment*, 586, 770-781.

- 693 Hunter, W. R., R. Niederdorfer, A. Gernand, B. Veuger, J. Prommer, M. Mooshammer, W.  
694 Wanek, and T. J. Battin (2016), Metabolism of mineral - sorbed organic matter and microbial  
695 lifestyles in fluvial ecosystems, *Geophysical Research Letters*.
- 696 Kanehisa, M., and S. Goto (2000), KEGG: kyoto encyclopedia of genes and genomes, *Nucleic  
697 acids research*, 28(1), 27-30.
- 698 Kellerman, A. M., D. N. Kothawala, T. Dittmar, and L. J. Tranvik (2015), Persistence of  
699 dissolved organic matter in lakes related to its molecular characteristics, *Nature Geoscience*,  
700 8(6), 454-457.
- 701 Kim, S., R. W. Kramer, and P. G. Hatcher (2003), Graphical method for analysis of ultrahigh-  
702 resolution broadband mass spectra of natural organic matter, the van Krevelen diagram,  
703 *Analytical Chemistry*, 75(20), 5336-5344.
- 704 King, A., J.-W. Nam, J. Han, J. Hilliard, and J. G. Jaworski (2007), Cuticular wax biosynthesis  
705 in petunia petals: cloning and characterization of an alcohol-acyltransferase that synthesizes  
706 wax-esters, *Planta*, 226(2), 381-394.
- 707 Knapp, A. K., C. Beier, D. D. Briske, A. T. Classen, Y. Luo, M. Reichstein, M. D. Smith, S. D.  
708 Smith, J. E. Bell, and P. A. Fay (2008), Consequences of more extreme precipitation regimes for  
709 terrestrial ecosystems, *Bioscience*, 58(9), 811-821.
- 710 Koch, B. P., M. Witt, R. Engbrodt, T. Dittmar, and G. Kattner (2005), Molecular formulae of  
711 marine and terrigenous dissolved organic matter detected by electrospray ionization Fourier  
712 transform ion cyclotron resonance mass spectrometry, *Geochimica et Cosmochimica Acta*,  
713 69(13), 3299-3308.
- 714 Kögel-Knabner, I. (2002), The macromolecular organic composition of plant and microbial  
715 residues as inputs to soil organic matter, *Soil Biology and Biochemistry*, 34(2), 139-162.
- 716 Kögel-Knabner, I. (2000), Analytical approaches for characterizing soil organic matter, *Organic  
717 Geochemistry*, 31(7), 609-625.
- 718 Kujawinski, E. B., and M. D. Behn (2006), Automated analysis of electrospray ionization  
719 Fourier transform ion cyclotron resonance mass spectra of natural organic matter, *Analytical  
720 Chemistry*, 78(13), 4363-4373.
- 721 Kuzyakov, Y. (2010), Priming effects: interactions between living and dead organic matter, *Soil  
722 Biology and Biochemistry*, 42(9), 1363-1371.
- 723 LaRowe, D. E., and P. Van Cappellen (2011), Degradation of natural organic matter: a  
724 thermodynamic analysis, *Geochimica et Cosmochimica Acta*, 75(8), 2030-2042.
- 725 Lehmann, J., and M. Kleber (2015), The contentious nature of soil organic matter, *Nature*,  
726 528(7580), 60-68.
- 727 Lin, X., J. McKinley, C. T. Resch, R. Kaluzny, C. L. Lauber, J. Fredrickson, R. Knight, and A.  
728 Konopka (2012), Spatial and temporal dynamics of the microbial community in the Hanford  
729 unconfined aquifer, *The ISME Journal*, 6(9), 1665-1676.
- 730 Lotspeich, F. B., and B. H. Reid (1980), Tri-tube freeze-core procedure for sampling stream  
731 gravels, *The Progressive Fish-Culturist*, 42(2), 96-99.
- 732 Mason, H., J. Begg, R. S. Maxwell, A. B. Kersting, and M. Zavarin (2016), A novel solid-state  
733 NMR method for the investigation of trivalent lanthanide sorption on amorphous silica at low  
734 surface loadings, *Environmental Science: Processes & Impacts*.
- 735 Minor, E. C., C. J. Steinbring, K. Longnecker, and E. B. Kujawinski (2012), Characterization of  
736 dissolved organic matter in Lake Superior and its watershed using ultrahigh resolution mass  
737 spectrometry, *Organic Geochemistry*, 43, 1-11.



738 Moser, D. P., J. K. Fredrickson, D. R. Geist, E. V. Arntzen, A. D. Peacock, S.-M. W. Li, T.  
739 Spadoni, and J. P. McKinley (2003), Biogeochemical processes and microbial characteristics  
740 across groundwater-surface water boundaries of the Hanford Reach of the Columbia River,  
741 *Environmental Science & Technology*, 37(22), 5127-5134.  
742 Peterson, R. E., and M. P. Connelly (2004), Water movement in the zone of interaction between  
743 groundwater and the Columbia River, Hanford site, Washington, *Journal of Hydraulic Research*,  
744 42(S1), 53-58.  
745 Raffaele, S., A. Leger, and D. Roby (2009), Very long chain fatty acid and lipid signaling in the  
746 response of plants to pathogens, *Plant signaling & behavior*, 4(2), 94-99.  
747 Regnier, P., P. Friedlingstein, P. Ciais, F. T. Mackenzie, N. Gruber, I. A. Janssens, G. G.  
748 Laruelle, R. Lauerwald, S. Luysaert, and A. J. Andersson (2013), Anthropogenic perturbation of  
749 the carbon fluxes from land to ocean, *Nature geoscience*, 6(8), 597-607.  
750 Rood, K., and M. Church (1994), Modified freeze-core technique for sampling the permanently  
751 wetted streambed, *North American Journal of Fisheries Management*, 14(4), 852-861.  
752 Rossel, P. E., C. Bienhold, A. Boetius, and T. Dittmar (2016), Dissolved organic matter in pore  
753 water of Arctic Ocean sediments: Environmental influence on molecular composition, *Organic*  
754 *Geochemistry*, 97, 41-52.  
755 Rothman, D. H., and D. C. Forney (2007), Physical model for the decay and preservation of  
756 marine organic carbon, *Science*, 316(5829), 1325-1328.  
757 Schmidt, M. W., M. S. Torn, S. Abiven, T. Dittmar, G. Guggenberger, I. A. Janssens, M. Kleber,  
758 I. Kögel-Knabner, J. Lehmann, and D. A. Manning (2011), Persistence of soil organic matter as  
759 an ecosystem property, *Nature*, 478(7367), 49-56.  
760 Shepherd, T., and D. Wynne Griffiths (2006), The effects of stress on plant cuticular waxes, *New*  
761 *Phytologist*, 171(3), 469-499.  
762 Six, J., P. Callewaert, S. Lenders, S. De Gryze, S. Morris, E. Gregorich, E. Paul, and K. Paustian  
763 (2002), Measuring and understanding carbon storage in afforested soils by physical fractionation,  
764 *Soil science society of America journal*, 66(6), 1981-1987.  
765 Slater, L. D., D. Ntarlagiannis, F. D. Day - Lewis, K. Mwakanyamale, R. J. Versteeg, A. Ward,  
766 C. Strickland, C. D. Johnson, and J. W. Lane (2010), Use of electrical imaging and distributed  
767 temperature sensing methods to characterize surface water-groundwater exchange regulating  
768 uranium transport at the Hanford 300 Area, Washington, *Water Resources Research*, 46(10).  
769 Stegen, J. C., J. K. Fredrickson, M. J. Wilkins, A. E. Konopka, W. C. Nelson, E. V. Arntzen, W.  
770 B. Chrisler, R. K. Chu, R. E. Danczak, and S. J. Fansler (2016), Groundwater-surface water  
771 mixing shifts ecological assembly processes and stimulates organic carbon turnover, *Nature*  
772 *Communications*, 7.  
773 Stegen, J. C., X. Lin, A. E. Konopka, and J. K. Fredrickson (2012), Stochastic and deterministic  
774 assembly processes in subsurface microbial communities, *The ISME Journal*, 6(9), 1653-1664.  
775 Tfaily, M. M., R. K. Chu, N. Tolić, K. M. Roscioli, C. R. Anderton, L. Pas□a-Tolić, E. W.  
776 Robinson, and N. J. Hess (2015), Advanced solvent based methods for molecular  
777 characterization of soil organic matter by high-resolution mass spectrometry, *Analytical*  
778 *chemistry*, 87(10), 5206-5215.  
779 Tfaily, M. M., D. C. Podgorski, J. E. Corbett, J. P. Chanton, and W. T. Cooper (2011), Influence  
780 of acidification on the optical properties and molecular composition of dissolved organic matter,  
781 *Analytica chimica acta*, 706(2), 261-267.

782 Tffaily, M. M., P. Reardon, R. K. Chu, N. Tolić, L. Pas□a-Tolić, E. W. Robinson, and N. J. Hess  
783 (2017), Sequential extraction protocol for organic matter from soils and sediments using high  
784 resolution mass spectrometry and proton NMR, *Analytica Chimica Acta*.  
785 Tholl, D. (2015), Biosynthesis and biological functions of terpenoids in plants, in *Biotechnology*  
786 *of Isoprenoids*, edited, pp. 63-106, Springer.  
787 Todd-Brown, K., J. Randerson, W. Post, F. Hoffman, C. Tarnocai, E. Schuur, and S. Allison  
788 (2013), Causes of variation in soil carbon simulations from CMIP5 Earth system models and  
789 comparison with observations, *Biogeosciences*, 10(3).  
790 Tremblay, L. B., T. Dittmar, A. G. Marshall, W. J. Cooper, and W. T. Cooper (2007), Molecular  
791 characterization of dissolved organic matter in a North Brazilian mangrove porewater and  
792 mangrove-fringed estuaries by ultrahigh resolution Fourier transform-ion cyclotron resonance  
793 mass spectrometry and excitation/emission spectroscopy, *Marine chemistry*, 105(1), 15-29.  
794 Ward, C. P., and R. M. Cory (2015), Chemical composition of dissolved organic matter draining  
795 permafrost soils, *Geochimica et Cosmochimica Acta*, 167, 63-79.  
796 Wieder, W. R., G. B. Bonan, and S. D. Allison (2013), Global soil carbon projections are  
797 improved by modelling microbial processes, *Nature Climate Change*, 3(10), 909-912.  
798 Wieder, W. R., C. C. Cleveland, W. K. Smith, and K. Todd-Brown (2015), Future productivity  
799 and carbon storage limited by terrestrial nutrient availability, *Nature Geoscience*, 8(6), 441-444.  
800 Willaman, J. J., and B. G. Schubert (1961), *Alkaloid-bearing plants and their contained*  
801 *alkaloids*, Agricultural Research Service, US Department of Agriculture.  
802 Zachara, J. M., P. E. Long, J. Bargar, J. A. Davis, P. Fox, J. K. Fredrickson, M. D. Freshley, A.  
803 E. Konopka, C. Liu, and J. P. McKinley (2013), Persistence of uranium groundwater plumes:  
804 Contrasting mechanisms at two DOE sites in the groundwater–river interaction zone, *Journal of*  
805 *contaminant hydrology*, 147, 45-72.  
806 Zhang, L., S. Wang, Y. Xu, Q. Shi, H. Zhao, B. Jiang, and J. Yang (2016), Molecular  
807 characterization of lake sediment WEON by Fourier transform ion cyclotron resonance mass  
808 spectrometry and its environmental implications, *Water Research*, 106, 196-203.  
809  
810

811 **Figures.**

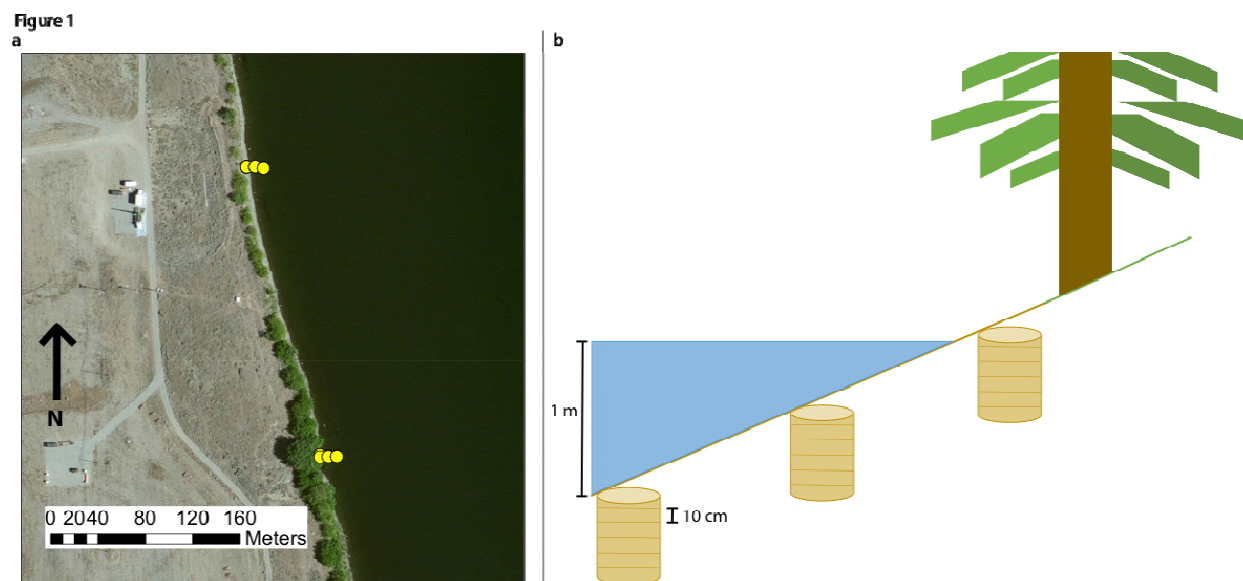

812

813 **Figure 1. Schematic of Sampling Design.** Samples were taken from three cores across an  
814 elevation gradient in a transect with or without dense vegetation. Panel (a) displays a satellite  
815 image of core locations. Cores without dense vegetation were obtained from the northern  
816 transect. Panel (b) shows a schematic of our sampling design. Within each core, samples were  
817 taken in 10-cm intervals from 0 to 60 cm. We extracted OC pools from each sample using a  
818 sequential extraction protocol ( $H_2O$ , MeOH, and  $CHCl_3$ ) to target water-soluble and bound-OC  
819 pools.

820

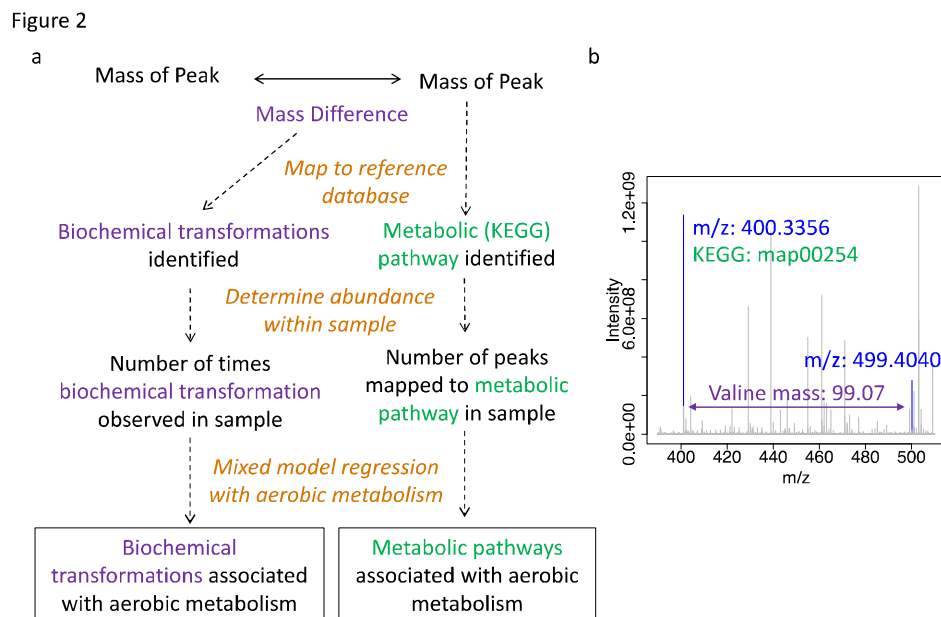

821

822 **Figure 2. Methodology for inferring biochemical transformations and metabolic pathways.**

823 Panel (a) depicts our workflow for analyzing biochemical transformations and metabolic

824 pathways. Biochemical OC transformations (purple) were identified by mapping mass

825 differences in pairwise m/z peak comparisons to a set of 92 known masses transferred in

826 common biochemical transformations (*e.g.*, glucose, amines). Metabolic pathways (green) were

827 identified by mapping all chemical formula assigned to m/z peaks to the KEGG database. Within

828 each sample, the abundance of each biochemical transformation and the number of peaks

829 mapping to each metabolic pathway were then correlated to aerobic metabolism to garner

830 insights into OC oxidation processes. Panel (b) displays an example portion of our FTICR-MS

831 spectra overlain with peak assignments (blue), a biochemical transformation (mass difference

832 between peaks, denoted in purple), and a metabolic pathway (associated with the left-hand peak,

833 denoted in green).

834

Figure 3

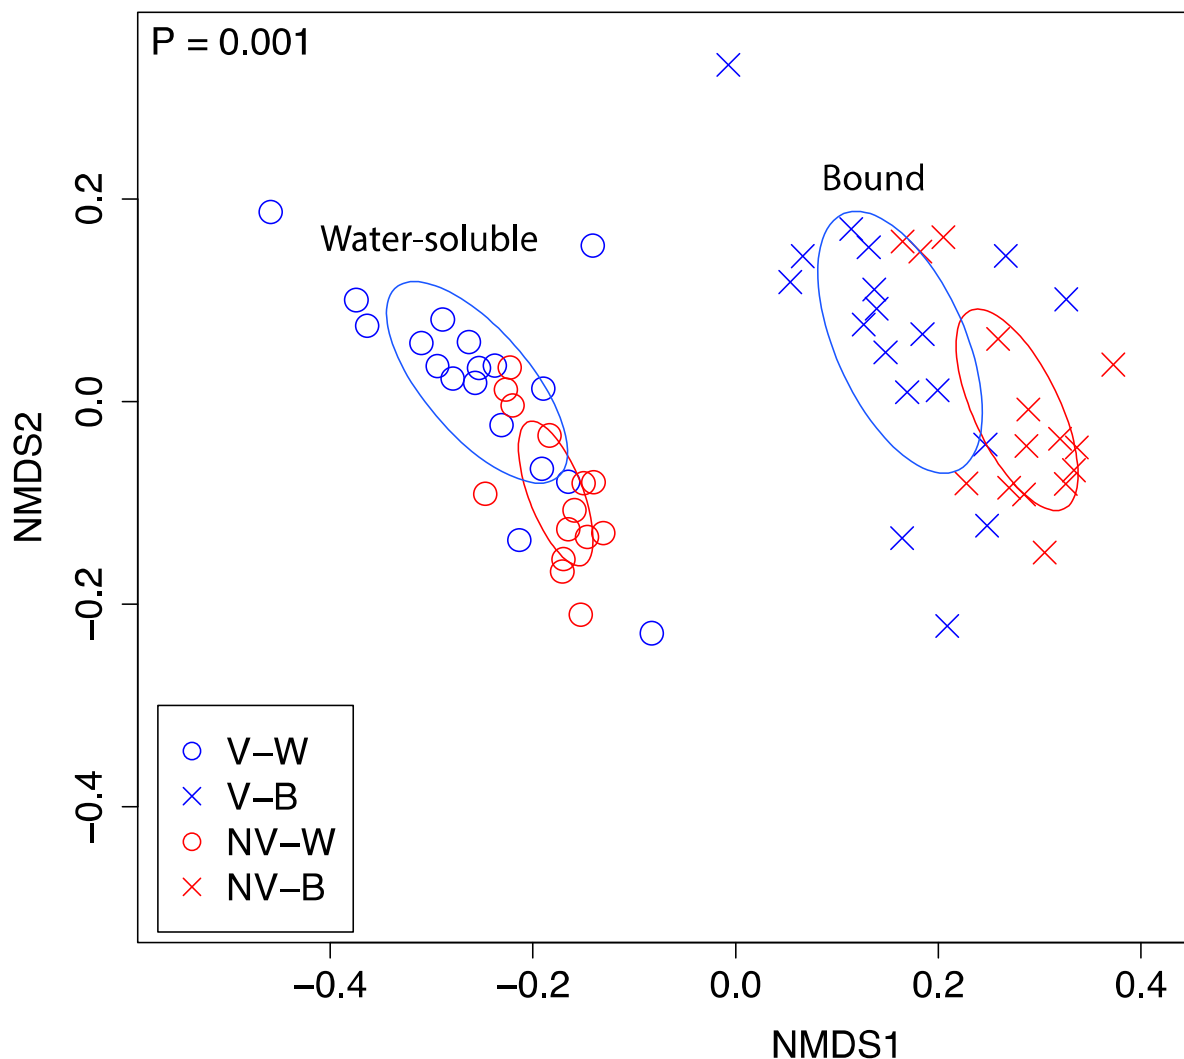

835  
836 **Figure 3. NMDS visualization of dissimilarity in OC pool composition.** Water-soluble and  
837 bound-OC pools are represented by open circles and x's, respectively. Samples associated with  
838 riparian vegetation are blue, and those in areas without vegetation are red. The P-value reflects  
839 differences among all groups, as assessed by PERMANOVA. Ellipses represent the standard  
840 deviation of the average axis scores for each group, generated using the 'ordiellipse' function in  
841 the 'vegan' package. Within each extraction, the composition of OC pools was significantly  
842 different across vegetation states (both  $P = 0.001$ ).  
843

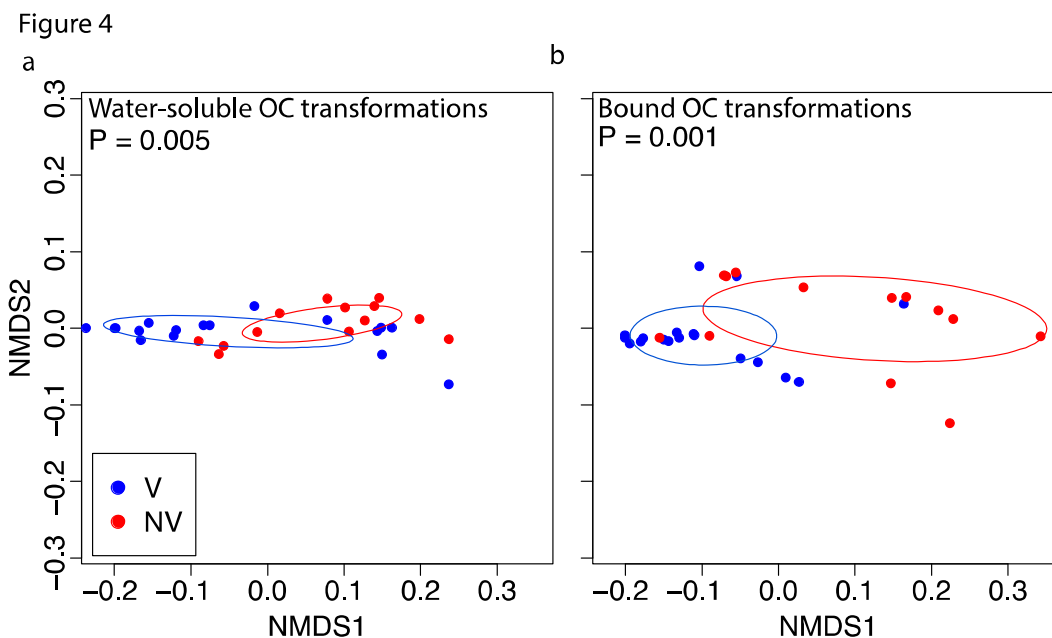

844

845 **Figure 4. NMDS visualization of biochemical transformation partitioning among vegetation**

846 **states.** Biochemical transformations that were correlated to aerobic metabolism were

847 significantly different among vegetation states in both the (a) water-soluble and (b) bound-OC

848 pools. V and NV are denoted in blue and red, respectively, and significance values are derived

849 from PERMANOVA. Ellipses represent the standard deviation of the average axis scores for

850 each group, generated using the 'ordiellipse' function in the 'vegan' package.

851

852

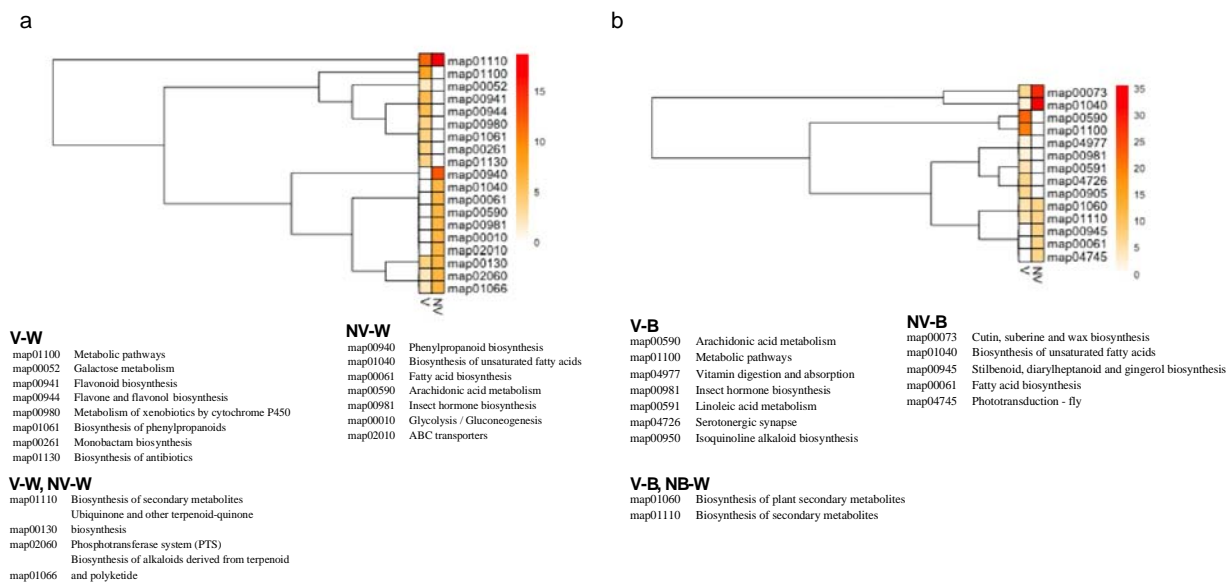

853

854 **Figure 5. KEGG pathways associated with aerobic metabolism.** A hierarchical clustering

855 heatmap shows KEGG pathways associated with aerobic metabolism. (a) and (b) show water-

856 soluble and bound-OC pools, respectively. Colors move from white to red on a scale of 0% to

857 20% in (a) and 0% to 35% in (b), showing percent relative abundance of each pathway in each

858 group. Pathways are described in the legends. Pathways listed under each condition (e.g., V-W,

859 etc.) had significant correlations to aerobic metabolism within that condition.

860

861

Figure 6

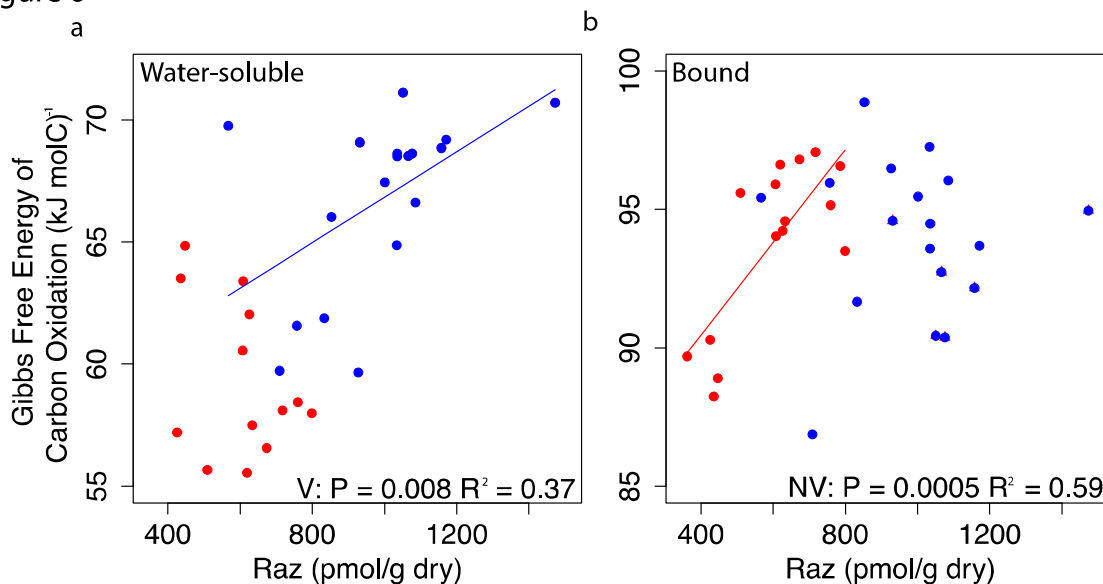

862

863 **Figure 6. Correlations between Gibbs free energy of carbon oxidation ( $\Delta G^{\circ}_{\text{Cox}}$ ) and aerobic**

864 **metabolism.** (a) and (b) display mixed linear regressions relating  $\Delta G^{\circ}_{\text{Cox}}$  to aerobic metabolism

865 in water-soluble and bound-OC pools, respectively. Aerobic metabolism is expressed as pmoles

866 of resazurin reduced to resorufin per gram of sediment dry weight over a 48hr incubation period

867 (Raz, see Supplemental Information). V and NV are denoted in blue and red, and solid lines

868 show significant relationships within each vegetation state.

869

870



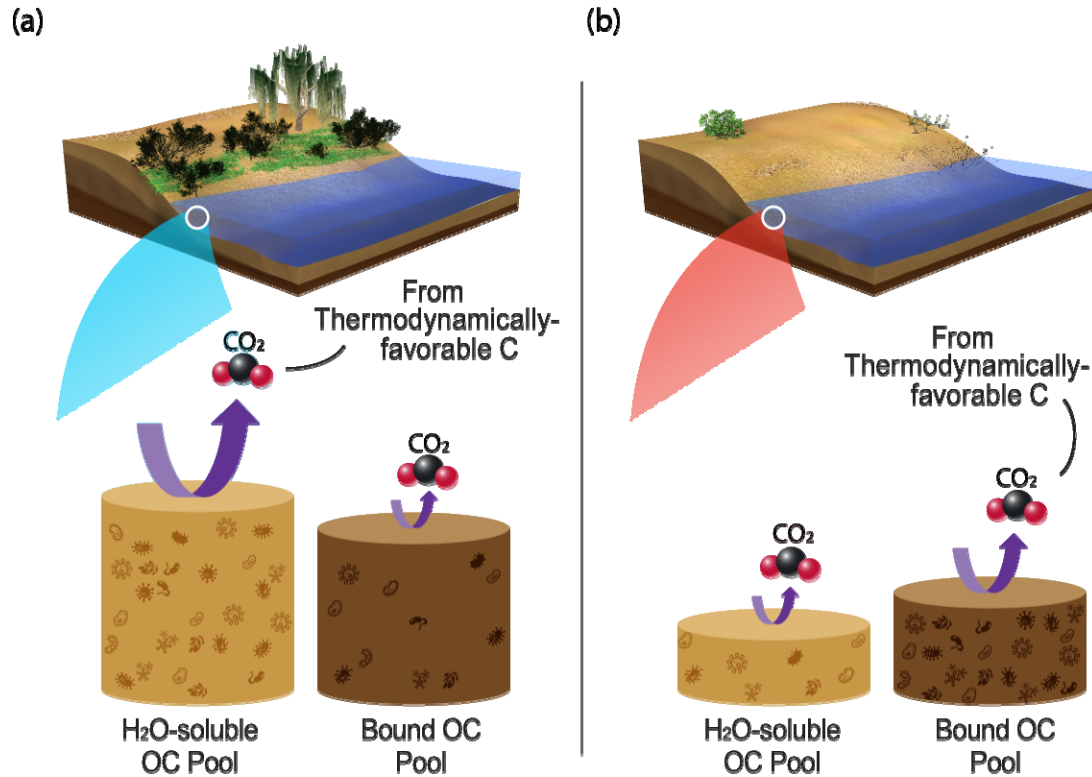

871

872 **Figure 7. Conceptualization of relationship between riparian vegetation and OC oxidation.**

873 We propose a conceptualization of OC oxidation at terrestrial-aquatic interfaces whereby (a)  
874 more riparian vegetation results in greater terrestrial C deposition and larger water-soluble and  
875 bound-OC pools. However, water-soluble OC is preferentially oxidized, which protects the  
876 bound-OC pool. Conversely, (b) areas deplete in riparian vegetation experience lower inputs of  
877 water-soluble OC and show lower rates of OC oxidation. This results in smaller OC pools  
878 (water-soluble and bound) and microbial adaptation for oxidation of the bound-OC pool. In both  
879 cases, the most thermodynamically favorable portions of the OC pool being metabolized are  
880 preferentially oxidized. Height of the cylinders denotes pool sizes, and arrow thickness denotes  
881 flux magnitude.

882

883

884 **Table 1. Acronyms and abbreviations used in this paper.**

| <b>Abbreviation/Acronym</b>     | <b>Description</b>                                               |
|---------------------------------|------------------------------------------------------------------|
| V                               | Transect with dense riparian vegetation (i.e., 'vegetated')      |
| NV                              | Transect with sparse riparian vegetation (i.e., 'not vegetated') |
| V-W                             | Transect V, water extraction (water-soluble OC)                  |
| V-B                             | Transect V, chloroform extraction (bound-OC)                     |
| NV-W                            | Transect NV, water extraction (water-soluble OC)                 |
| NV-B                            | Transect NV, chloroform extraction (bound-OC)                    |
| C                               | Carbon                                                           |
| OC                              | Organic carbon                                                   |
| FTICR-MS                        | Fourier transform ion cyclotron resonance mass spectrometry      |
| KEGG                            | Kyoto Encyclopedia of Genes and Genomes                          |
| $\Delta G^{\circ}_{\text{Cox}}$ | Gibbs free energy of C oxidation                                 |

885

886

887 **Table 2. Biochemical transformations and the amount of variation in aerobic metabolism**  
 888 **explained by each ( $R^2$ ), within each OC pool and vegetation state.**

|                                           | $R^2$ |
|-------------------------------------------|-------|
| <b>V-W</b>                                |       |
| uridine_5_diphosphate_(-H2O)_C9H12N2O11P2 | 0.49  |
| cytosine_(-H)_C4H4N3O                     | 0.44  |
| uridine_5_monophosphate_(-H2O)_C9H11N2O8P | 0.41  |
| guanine_(-H)_C5H4N5O                      | 0.38  |
| guanosine_(-H2O)_C10H11N5O4               | 0.37  |
| adenine_(-H)_C5H4N5                       | 0.36  |
| glutathione_(-H2O)_C10H15N3O5S            | 0.34  |
| uracil_(-H)_C4H3N2O2                      | 0.33  |
| C6H10O6                                   | 0.30  |
| glucose_C6H12O6                           | 0.29  |
| Aspartic_Acid_C4H5NO3                     | 0.28  |
| Glucuronic_Acid_(-H2O)                    | 0.28  |
| D-Ribose_(-H2O)_ribosylation)             | 0.27  |
| secondary_amine                           | 0.26  |
| C6H10O5                                   | 0.25  |
| monosaccharide_(-H2O)                     | 0.25  |
| Glutamic_Acid_C5H7NO3                     | 0.24  |
| diphosphate_H3O6P2                        | 0.23  |
| thymine_(-H)_C5H5N2O2                     | 0.23  |
| glyoxylate_(-H2O)_C2O2                    | 0.23  |
| malonyl_group_(-H2O)_C3H2O3               | 0.22  |
| adenosine_(-H2O)_C10H11N5O3               | 0.22  |
| primary_amine                             | 0.21  |
| thymidine_(-H2O)_C10H12N2O4               | 0.21  |
| carbamoyl_P_transfer_(-H2PO4)_CH2ON       | 0.20  |
| erythrose_(-H2O)                          | 0.20  |
| <b>V-B</b>                                |       |
| isoprene_addition_(-H)_C5H7               | 0.39  |
| hydrogenation_dehydrogenation_H2          | 0.24  |
| biotinyl_(-H2O)_C10H14N2O2S               | 0.16  |
| <b>NV-W</b>                               |       |
| Glucuronic_Acid_(-H2O)                    | 0.49  |
| C6H10O6                                   | 0.49  |
| acetone_(-H)_C3H5O                        | 0.45  |
| adenine_(-H)_C5H4N5                       | 0.45  |

889
